# Supplementary material for: Beyond Murray’s Law: Resistance Matching Principle for Optimal Fluid Transport in Hierarchical Nanomaterials
Source: Research Square preprint supplement (doi:10.21203/rs.3.rs-6547752/v1), 2025-05-06
Supplement: Supplementary file 1 [file 2653132046f381c7c7217026.xlsx]

## Sheet: Figure 2b
Figure 2b
d (nm)	ρavg (g/cm3)	ηavg (Pa·s)
0.52	0.08365	6.18709e-06
0.54	0.32717	4.73955e-05
0.56	0.47884	7.403e-05
0.58	0.49054	7.70774e-05
0.615	0.4769	7.35398e-05
0.635	0.4657	7.08107e-05
0.655	0.45442	6.8212e-05
0.675	0.44409	6.59575e-05
0.695	0.43749	6.4578e-05
0.715	0.43722	6.45212e-05
0.735	0.44404	6.59473e-05
0.755	0.47034	7.1923e-05
0.775	0.519	8.52846e-05
0.795	0.57111	0.000103726
0.815	0.62364	0.000128048
0.835	0.65024	0.000143197
0.855	0.65635	0.000146995
0.875	0.65702	0.000147419
0.895	0.65243	0.000144543
0.915	0.64461	0.000139808
0.935	0.6378	0.000135842
0.955	0.63269	0.000132961
0.975	0.62921	0.000131046
0.995	0.6323	0.000132743
1.015	0.64243	0.000138524
1.02	0.64317	0.000138957
1.04	0.66287	0.000151191
1.06	0.69182	0.000171765
1.08	0.71235	0.000188543
1.1	0.72796	0.000202701
1.12	0.73513	0.000209663
1.14	0.73511	0.000209635
1.16	0.73414	0.000208683
1.18	0.73135	0.000205954
1.2	0.7267	0.000201514
1.22	0.72373	0.000198738
1.24	0.72233	0.000197445
1.26	0.72177	0.00019693
1.28	0.72699	0.000201781
1.3	0.7374	0.000211918
1.32	0.74813	0.000223055
1.34	0.76317	0.000239941
1.36	0.77501	0.000254381
1.38	0.77981	0.000260558
1.4	0.78365	0.000265624
1.42	0.78472	0.00026706
1.44	0.78268	0.000264333
1.46	0.78127	0.000262473
1.48	0.77966	0.000260358
1.5	0.77718	0.000257157
1.52	0.77719	0.000257166
1.54	0.77923	0.000259804
1.56	0.78179	0.000263151
1.58	0.78929	0.000273313
1.6	0.79866	0.000286708
1.62	0.80484	0.000296014
1.64	0.81163	0.000306677
1.66	0.81588	0.000313605
1.68	0.81645	0.00031454
1.7	0.81731	0.000315979
1.72	0.81718	0.000315762
1.74	0.81533	0.000312698
1.76	0.81473	0.000311705
1.78	0.81457	0.000311446
1.8	0.81389	0.000310336
1.82	0.81596	0.000313736
1.84	0.81984	0.000320233
1.86	0.82326	0.000326103
1.88	0.82943	0.000337063
1.9	0.83501	0.000347382
1.92	0.83741	0.000351945
1.94	0.84025	0.000357459
1.96	0.84183	0.000360564
1.98	0.84123	0.000359379
2	0.84142	0.000359744
2.02	0.84134	0.000359593
2.04	0.84014	0.000357238
2.06	0.84048	0.000357901
2.08	0.84152	0.000359957
2.1	0.84207	0.000361038
2.12	0.84511	0.000367132
2.14	0.84908	0.000375278
2.16	0.85156	0.000380501
2.18	0.85533	0.000388603
2.2	0.8582	0.000394919
2.22	0.85879	0.000396248
2.24	0.86005	0.000399071
2.26	0.86073	0.000400603
2.28	0.85995	0.000398838
2.3	0.86018	0.000399369
2.32	0.86051	0.000400104
2.34	0.85998	0.000398918
2.36	0.86109	0.000401421
2.38	0.86287	0.000405501
2.4	0.86392	0.000407939
2.42	0.86682	0.000414738
2.44	0.86978	0.000421841
2.46	0.87102	0.00042486
2.48	0.87311	0.000430018
2.5	0.8746	0.00043374
2.52	0.87447	0.000433432
2.54	0.87515	0.000435143
2.56	0.87562	0.000436318
2.58	0.875	0.000434751
2.6	0.8755	0.000436029
2.62	0.87625	0.000437937
2.64	0.87625	0.000437918
2.66	0.87777	0.000441815
2.68	0.87971	0.000446849
2.7	0.88064	0.000449296
2.72	0.8828	0.000455053
2.74	0.88471	0.000460213
2.76	0.88513	0.000461352
2.78	0.88633	0.00046464
2.8	0.8872	0.000467042
2.82	0.88686	0.000466094
2.84	0.88739	0.000467577
2.86	0.88791	0.000469011
2.88	0.88754	0.000467984
2.9	0.88832	0.000470151
2.92	0.88936	0.000473071
2.94	0.88961	0.000473788
2.96	0.89115	0.000478172
2.98	0.89282	0.000482975
3	0.89337	0.000484558
3.02	0.89483	0.000488853
3.04	0.89605	0.00049245
3.06	0.89605	0.000492451
3.08	0.89683	0.000494782
3.1	0.89746	0.000496671
3.12	0.89712	0.000495639
3.14	0.89768	0.000497335
3.16	0.89832	0.000499264
3.18	0.89817	0.000498809
3.2	0.89911	0.000501659
3.22	0.90022	0.000505074
3.24	0.9005	0.000505938
3.26	0.90182	0.000510003
3.28	0.90308	0.000513972
3.3	0.90329	0.00051461
3.32	0.90428	0.000517766
3.34	0.90511	0.000520408
3.36	0.90494	0.000519855
3.38	0.90555	0.000521812
3.4	0.90611	0.000523636
3.42	0.90585	0.000522785
3.44	0.90649	0.000524834
3.46	0.90722	0.000527215
3.48	0.9072	0.000527147
3.5	0.90815	0.000530247
3.52	0.90918	0.000533657
3.54	0.90935	0.000534223
3.56	0.91038	0.000537626
3.58	0.91131	0.000540758
3.6	0.91129	0.000540712
3.62	0.91202	0.000543169
3.64	0.91266	0.000545327
3.66	0.91244	0.000544587
3.68	0.913	0.00054649
3.7	0.91357	0.000548444
3.72	0.91339	0.000547836
3.74	0.91407	0.000550173
3.76	0.91483	0.000552792
3.78	0.91484	0.000552819
3.8	0.9157	0.000555836
3.82	0.91658	0.000558896
3.84	0.91662	0.000559033
3.86	0.9174	0.000561811
3.88	0.91811	0.000564334
3.9	0.91799	0.000563892
3.92	0.91857	0.000565989
3.94	0.91912	0.000567957
3.96	0.91892	0.000567223
3.98	0.91947	0.000569201
4	0.92005	0.000571307
4.02	0.91993	0.00057088
4.04	0.92061	0.000573326
4.06	0.92132	0.000575929
4.08	0.92131	0.000575881
4.1	0.92204	0.000578596
4.12	0.92276	0.00058123
4.14	0.92269	0.000581
4.16	0.92332	0.000583325
4.18	0.92389	0.000585476
4.2	0.92373	0.00058485
4.22	0.92425	0.000586794
4.24	0.92476	0.00058872
4.26	0.92458	0.000588061
4.28	0.92513	0.000590118
4.3	0.925	0.000589649
4.32	0.92561	0.000591932
4.34	0.92623	0.000594318
4.36	0.92617	0.000594093
4.38	0.92681	0.000596538
4.4	0.92743	0.00059892
4.42	0.92733	0.000598554
4.44	0.92789	0.000600715
4.46	0.92842	0.000602756
4.48	0.92825	0.000602119
4.5	0.92874	0.000604021
4.52	0.92922	0.000605914
4.54	0.92906	0.000605265
4.56	0.92957	0.000607253
4.58	0.93009	0.000609327
4.6	0.92998	0.000608874
4.62	0.93053	0.000611077
4.64	0.9311	0.000613319
4.66	0.931	0.000612948
4.68	0.93155	0.000615129
4.7	0.93207	0.000617231
4.72	0.93194	0.000616688
4.74	0.93242	0.000618629
4.76	0.93288	0.000620506
4.78	0.93272	0.000619825
4.8	0.93317	0.000621668
4.82	0.93363	0.000623538
4.84	0.93348	0.000622927
4.86	0.93396	0.000624891
4.88	0.93445	0.000626903
4.9	0.93433	0.000626418
4.92	0.93484	0.000628486
4.94	0.93533	0.00063054
4.96	0.93521	0.000630033
4.98	0.93568	0.000631994
5	0.93614	0.000633892
5.1	0.93711	0.000637952
5.2	0.93817	0.000642442
5.3	0.93974	0.000649175
5.4	0.94063	0.000652986
5.5	0.94157	0.000657116
5.6	0.94297	0.000663278
5.7	0.94378	0.000666868
5.8	0.94461	0.000670613
5.9	0.94588	0.000676341
6	0.94661	0.000679705
6.1	0.94735	0.000683086
6.2	0.94851	0.000688472
6.3	0.94917	0.000691599
6.4	0.94982	0.00069466
6.5	0.9509	0.000699757
6.6	0.9515	0.000702647
6.7	0.95208	0.000705436
6.8	0.95308	0.000710274
6.9	0.95362	0.000712936
7	0.95414	0.000715497
7.1	0.95507	0.000720093
7.2	0.95557	0.000722545
7.3	0.95604	0.00072491
7.4	0.95691	0.00072928
7.5	0.95735	0.000731542
7.6	0.95779	0.000733735
7.7	0.9586	0.000737892
7.8	0.95901	0.000739984
7.9	0.9594	0.000742023
8	0.96016	0.000745981
8.1	0.96053	0.000747923
8.2	0.9609	0.000749822
8.3	0.96161	0.000753595
8.4	0.96195	0.000755401
8.5	0.96229	0.000757171
8.6	0.96261	0.000758908
8.7	0.96328	0.000762457
8.8	0.96358	0.000764109
8.9	0.96388	0.000765729
9	0.96451	0.000769126
9.1	0.96479	0.000770669
9.2	0.96507	0.000772182
9.3	0.96566	0.000775438
9.4	0.96593	0.00077688
9.5	0.96618	0.000778296
9.6	0.96675	0.00078142
9.7	0.96699	0.000782771
9.8	0.96723	0.000784097
9.9	0.96776	0.000787099
10	0.96799	0.000788365
10.1	0.96821	0.000789609
10.2	0.96872	0.000792496
10.3	0.96893	0.000793684
10.4	0.96913	0.000794852
10.5	0.96962	0.000797632
10.6	0.96982	0.000798748
10.7	0.97001	0.000799846
10.8	0.97047	0.000802525
10.9	0.97065	0.000803575
11	0.97083	0.000804607
11.1	0.97128	0.000807193
11.2	0.97145	0.00080818
11.3	0.97161	0.000809152
11.4	0.97204	0.000811649
11.5	0.9722	0.00081258
11.6	0.97236	0.000813495
11.7	0.97277	0.000815909
11.8	0.97291	0.000816786
11.9	0.97306	0.00081765
12	0.97345	0.000819985
12.1	0.97359	0.000820812
12.2	0.97373	0.000821627
12.3	0.97411	0.000823888
12.4	0.97424	0.000824669
12.5	0.97437	0.000825439
12.6	0.97473	0.00082763
12.7	0.97485	0.000828368
12.8	0.97497	0.000829095
12.9	0.97509	0.000829812
13	0.97544	0.000831917
13.1	0.97555	0.000832605
13.2	0.97567	0.000833283
13.3	0.976	0.000835326
13.4	0.97611	0.000835977
13.5	0.97621	0.000836619
13.6	0.97654	0.000838603
13.7	0.97664	0.000839219
13.8	0.97674	0.000839827
13.9	0.97705	0.000841756
14	0.97714	0.000842339
14.1	0.97724	0.000842915
14.2	0.97754	0.000844791
14.3	0.97763	0.000845343
14.4	0.97772	0.000845889
14.5	0.97801	0.000847714
14.6	0.97809	0.000848238
14.7	0.97818	0.000848755
14.8	0.97846	0.000850533
14.9	0.97854	0.00085103
15	0.97862	0.00085152
15.1	0.9789	0.000853252
15.2	0.97897	0.000853723
15.3	0.97904	0.000854188
15.4	0.97931	0.000855876
15.5	0.97938	0.000856323
15.6	0.97945	0.000856765
15.7	0.97971	0.000858411
15.8	0.97978	0.000858835
15.9	0.97985	0.000859254
16	0.9801	0.000860861
16.1	0.98016	0.000861264
16.2	0.98022	0.000861661
16.3	0.98047	0.00086323
16.4	0.98053	0.000863612
16.5	0.98059	0.00086399
16.6	0.98083	0.000865522
16.7	0.98089	0.000865885
16.8	0.98094	0.000866244
16.9	0.98117	0.00086774
17	0.98123	0.000868085
17.1	0.98128	0.000868426
17.2	0.98133	0.000868764
17.3	0.98156	0.000870217
17.4	0.98161	0.000870541
17.5	0.98166	0.000870861
17.6	0.98188	0.000872283
17.7	0.98193	0.000872591
17.8	0.98197	0.000872895
17.9	0.98219	0.000874286
18	0.98223	0.000874579
18.1	0.98228	0.000874868
18.2	0.98248	0.000876229
18.3	0.98253	0.000876507
18.4	0.98257	0.000876783
18.5	0.98277	0.000878115
18.6	0.98281	0.00087838
18.7	0.98285	0.000878641
18.8	0.98305	0.000879947
18.9	0.98309	0.000880198
19	0.98313	0.000880447
19.1	0.98332	0.000881726
19.2	0.98336	0.000881964
19.3	0.9834	0.000882201
19.4	0.98359	0.000883455
19.5	0.98362	0.000883681
19.6	0.98365	0.000883906
19.7	0.98384	0.000885135
19.8	0.98387	0.000885351
19.9	0.9839	0.000885564
20	0.98409	0.00088677
30	0.98935	0.000922706
40	0.99206	0.000941992
50	0.99363	0.000953398
60	0.99472	0.000961483
70	0.99546	0.000966996
80	0.99605	0.000971444
90	0.99651	0.000974924
100	0.99685	0.000977492
110	0.99715	0.000979808
120	0.99738	0.000981553
130	0.99759	0.00098321
140	0.99776	0.000984469
150	0.99792	0.000985716
160	0.99804	0.000986664
170	0.99817	0.000987638
180	0.99828	0.000988505
190	0.99837	0.000989159
200	0.99846	0.000989865
300	0.99898	0.000993961
400	0.99925	0.000996077
500	0.99941	0.000997302
600	0.99952	0.00099816
700	0.99959	0.000998739
800	0.99965	0.000999204
900	0.9997	0.000999565
1000	0.99973	0.000999831

## Sheet: Figure 2c
Figure 2c
d (nm)	Rη (Pa·s·m2/kg)	Rλ (Pa·s·m2/kg)	Rtotal (Pa·s·m2/kg)
0.64	3519100000000	211334000000	199362000000
0.6624	3453760000000	214670000000	202108000000
0.7176	2891540000000	194701000000	182418000000
0.7728	2355750000000	170826000000	159276000000
0.828	1974700000000	153423000000	142362000000
0.8832	1741170000000	144297000000	133254000000
0.9384	1705270000000	150155000000	138003000000
0.9936	1921610000000	179158000000	163879000000
1.0488	1932680000000	190200000000	173159000000
1.104	1682510000000	174295000000	157935000000
1.1592	1446360000000	157324000000	141890000000
1.2144	1277720000000	145599000000	130705000000
1.2696	1200420000000	143007000000	127784000000
1.3248	1240010000000	154146000000	137103000000
1.38	1274070000000	164980000000	146066000000
1.4352	1195840000000	161044000000	141930000000
1.4904	1083590000000	151540000000	132947000000
1.5456	974768000000	141370000000	123464000000
1.6008	902026000000	135492000000	117798000000
1.656	872649000000	135600000000	117363000000
1.7112	888716000000	142699000000	122957000000
1.7664	873599000000	144797000000	124210000000
1.8216	820404000000	140229000000	119759000000
1.8768	761354000000	134080000000	114003000000
1.932	705540000000	127905000000	108276000000
1.9872	670517000000	125029000000	105379000000
2.0424	655464000000	125617000000	105415000000
2.0976	652214000000	128372000000	107261000000
2.1528	629677000000	127198000000	105821000000
2.208	599250000000	124155000000	102847000000
2.2632	563488000000	119665000000	98703500000
2.3184	534447000000	116266000000	95492000000
2.3736	512508000000	114148000000	93355200000
2.4288	503805000000	114819000000	93508000000
2.484	492571000000	114810000000	93108000000
2.5392	477635000000	113802000000	91905000000
2.5944	457854000000	111461000000	89639000000
2.6496	435867000000	108366000000	86788500000
2.7048	418664000000	106257000000	84748200000
2.76	404668000000	104801000000	83242900000
2.8152	396868000000	104837000000	82929900000
2.8704	386491000000	104097000000	82009100000
2.9256	375121000000	102978000000	80797600000
2.9808	360497000000	100831000000	78792500000
3.036	347560000000	99012300000	77059700000
3.0912	335155000000	97214600000	75356700000
3.1464	326637000000	96435800000	74454100000
3.2016	318416000000	95657700000	73559200000
3.2568	311278000000	95125700000	72859900000
3.312	301616000000	93735400000	71511300000
3.3672	292494000000	92415400000	70226800000
3.4224	283741000000	91119600000	68970600000
3.4776	275072000000	89760400000	67676500000
3.5328	268683000000	89067200000	66892600000
3.588	261964000000	88196800000	65982200000
3.6432	256134000000	87560500000	65253300000
3.6984	248836000000	86354700000	64107300000
3.7536	242264000000	85328800000	63103000000
3.8088	235242000000	84073800000	61937700000
3.864	229639000000	83260700000	61105500000
3.9192	223869000000	82328500000	60192600000
3.9744	219209000000	81750300000	59544300000
4.0296	213808000000	80843400000	58662400000
4.0848	208925000000	80079200000	57890300000
4.14	203404000000	79016600000	56909000000
4.1952	198776000000	78248200000	56146200000
4.2504	194494000000	77570000000	55453500000
4.3056	189920000000	76729500000	54650300000
4.3608	186125000000	76160400000	54045600000
4.416	181783000000	75325200000	53257100000
4.4712	177982000000	74672300000	52602800000
4.5264	173731000000	73788300000	51791100000
4.5816	170157000000	73152000000	51158500000
4.6368	166294000000	72352400000	50416700000
4.692	163103000000	71809100000	49858200000
4.7472	159549000000	71070600000	49168600000
4.8024	156507000000	70526300000	48617800000
4.8576	153064000000	69767400000	47923600000
4.9128	150123000000	69204700000	47368500000
4.968	146883000000	68471900000	46701400000
5.0232	144177000000	67957000000	46187000000
5.0784	141574000000	67463600000	45690800000
5.1336	138667000000	66796600000	45080900000
5.1888	136187000000	66307400000	44594900000
5.244	133399000000	65640700000	43993200000
5.2992	131026000000	65151800000	43514500000
5.3544	128396000000	64509000000	42936700000
5.4096	126183000000	64050600000	42485100000
5.4648	123723000000	63442900000	41937900000
5.52	121638000000	63004000000	41505700000
5.5752	119298000000	62409900000	40974500000
5.6304	117304000000	61974000000	40550400000
5.6856	115075000000	61392500000	40034200000
5.7408	113187000000	60971500000	39625900000
5.796	111086000000	60414900000	39132400000
5.8512	109306000000	60013500000	38742400000
5.9064	107569000000	59616500000	38357900000
5.9616	105619000000	59083300000	37888500000
6.0168	103960000000	58693300000	37513800000
6.072	102103000000	58173800000	37059100000
6.1272	100526000000	57796400000	36697600000
6.1824	98765500000	57295500000	36260300000
6.2376	97270400000	56932000000	35912500000
6.2928	95594900000	56446500000	35490300000
6.348	94168300000	56091900000	35152900000
6.4032	92568500000	55618400000	34743400000
6.4584	91207000000	55272800000	34416100000
6.5136	89682500000	54813400000	34020400000
6.5688	88386300000	54479000000	33704500000
6.624	86933500000	54033800000	33322300000
6.6792	85696600000	53708900000	33016400000
6.7344	84485100000	53387200000	32714500000
6.7896	83125300000	52958500000	32349100000
6.8448	81967000000	52645100000	32056300000
6.9	80667700000	52228400000	31702600000
6.9552	79561200000	51924200000	31419100000
7.0104	78319200000	51519200000	31076600000
7.0656	77260600000	51223100000	30801800000
7.1208	76071400000	50828600000	30469700000
7.176	75057400000	50539900000	30202800000
7.2312	73918100000	50155600000	29880700000
7.2864	72946900000	49874500000	29621800000
7.3416	71855600000	49500500000	29309500000
7.3968	70925000000	49226800000	29058300000
7.452	69878600000	48862500000	28755300000
7.5072	68985800000	48595500000	28511300000
7.5624	67981600000	48240200000	28217200000
7.6176	67124700000	47979900000	27980100000
7.6728	66284000000	47722300000	27746100000
7.728	65338200000	47379800000	27464200000
7.7832	64530900000	47128600000	27236800000
7.8384	63622200000	46794500000	26963000000
7.8936	62846300000	46549300000	26742000000
7.9488	61972800000	46223300000	26475900000
8.004	61226800000	45984000000	26260900000
8.0592	60386700000	45665900000	26002300000
8.1144	59669100000	45432300000	25793200000
8.1696	58860900000	45121700000	25541800000
8.2248	58170200000	44893600000	25338400000
8.28	57392100000	44590300000	25093900000
8.3352	56727100000	44367500000	24895900000
8.3904	55977600000	44071200000	24658000000
8.4456	55336900000	43853500000	24465200000
8.5008	54707300000	43637800000	24274800000
8.556	53997300000	43351200000	24046100000
8.6112	53390300000	43140400000	23860600000
8.6664	52705800000	42860300000	23638000000
8.7216	52120400000	42654200000	23457300000
8.7768	51460000000	42380400000	23240500000
8.832	50895200000	42178800000	23064400000
8.9	50190300000	41914900000	22840400000
9	49118300000	41480500000	22488700000
9.1	48080300000	41055100000	22145400000
9.2	47149200000	40702400000	21844600000
9.3	46172800000	40292800000	21516400000
9.4	45226300000	39891200000	21195800000
9.5	44376400000	39557900000	20914400000
9.6	43484500000	39170900000	20607600000
9.7	42619100000	38791300000	20307600000
9.8	41841300000	38475900000	20044100000
9.9	41019300000	38104900000	19754200000
10	40226100000	37745600000	19473200000
10.1	39512600000	37446900000	19226000000
10.2	38762600000	37099800000	18956500000
10.3	38033700000	36759000000	18692700000
10.4	37377500000	36475600000	18460500000
10.5	36687200000	36146100000	18207300000
10.6	36015800000	35822600000	17959500000
10.7	35410900000	35553300000	17741000000
10.8	34774100000	35240200000	17502800000
10.9	34154300000	34932600000	17269500000
11	33595600000	34676300000	17063700000
11.1	33006900000	34378400000	16839300000
11.2	32433500000	34085600000	16619500000
11.3	31916300000	33841500000	16425400000
11.4	31371100000	33557700000	16213800000
11.5	30839600000	33278600000	16006400000
11.6	30321600000	33004100000	15803000000
11.7	29853900000	32775200000	15623200000
11.8	29360400000	32508900000	15427300000
11.9	28879000000	32246900000	15235100000
12	28444200000	32028300000	15065000000
12.1	27985100000	31773900000	14879700000
12.2	27537000000	31523600000	14697900000
12.3	27132100000	31314600000	14536800000
12.4	26704300000	31071400000	14361400000
12.5	26286500000	30831900000	14189200000
12.6	25908700000	30631900000	14036500000
12.7	25509400000	30399200000	13870200000
12.8	25119200000	30169900000	13706900000
12.9	24766200000	29978400000	13562100000
13	24392900000	29755400000	13404300000
13.1	24028000000	29535700000	13249400000
13.2	23697700000	29352100000	13111800000
13.3	23348200000	29138300000	12961900000
13.4	23006400000	28927600000	12814700000
13.5	22696900000	28751400000	12683900000
13.6	22369200000	28546200000	12541500000
13.7	22048600000	28343900000	12401500000
13.8	21758200000	28174700000	12277100000
13.9	21450500000	27977700000	12141600000
14	21149400000	27783400000	12008300000
14.1	20876500000	27620700000	11889800000
14.2	20587300000	27431300000	11760800000
14.3	20304100000	27244500000	11633900000
14.4	20047300000	27088000000	11520900000
14.5	19775200000	26905900000	11397900000
14.6	19508500000	26726100000	11277000000
14.7	19266600000	26575500000	11169200000
14.8	19010200000	26400100000	11051900000
14.9	18758800000	26227000000	10936500000
15	18530700000	26082000000	10833600000
15.1	18288700000	25913000000	10721700000
15.2	18051400000	25746200000	10611400000
15.3	17836100000	25606400000	10513200000
15.4	17607600000	25443600000	10406200000
15.5	17383400000	25282700000	10300900000
15.6	17179800000	25147900000	10206900000
15.7	16963800000	24990800000	10104700000
15.8	16751700000	24835600000	10004000000
15.9	16559200000	24705500000	9914100000
16	16354600000	24553800000	9816280000
16.1	16153900000	24404000000	9719930000
16.2	15971500000	24278400000	9633870000
16.3	15777800000	24131900000	9540230000
16.4	15587500000	23987200000	9447970000
16.5	15414600000	23865700000	9365520000
16.6	15230900000	23724200000	9275810000
16.7	15050400000	23584300000	9187410000
16.8	14886300000	23466900000	9108380000
16.9	14711900000	23330000000	9022390000
17	14540600000	23194700000	8937640000
17.1	14384700000	23081100000	8861830000
17.2	14219100000	22948700000	8779350000
17.3	14056200000	22817800000	8698050000
17.4	13896200000	22688300000	8617880000
17.5	13750600000	22579600000	8546130000
17.6	13595700000	22452900000	8468080000
17.7	13443400000	22327500000	8391120000
17.8	13304800000	22222200000	8322200000
17.9	13157400000	22099500000	8247240000
18	13012400000	21978000000	8173300000
18.1	12880400000	21876000000	8107060000
18.2	12740000000	21757000000	8035020000
18.3	12601800000	21639300000	7963950000
18.4	12476000000	21540400000	7900260000
18.5	12342100000	21425000000	7830990000
18.6	12210400000	21310800000	7762640000
18.7	12090400000	21214900000	7701360000
18.8	11962600000	21102900000	7634720000
18.9	11836900000	20992200000	7568960000
19	11722300000	20899000000	7509970000
19.1	11600400000	20790400000	7445830000
19.2	11480300000	20682900000	7382520000
19.3	11370900000	20592500000	7325710000
19.4	11254300000	20487000000	7263940000
19.5	11139500000	20382600000	7202950000
19.6	11034900000	20294800000	7148220000
19.7	10923500000	20192300000	7088700000
19.8	10813700000	20090900000	7029940000
19.9	10713700000	20005500000	6977170000
20	10607700000	19907200000	6920230000
30	4800770000	13514200000	3542380000
40	2725210000	10228700000	2151890000
50	1753230000	8225580000	1445190000
60	1222070000	6880270000	1037750000
70	900247000	5913140000	781298000
80	690635000	5184380000	609447000
90	546446000	4614750000	488590000
100	443182000	4158540000	400500000
110	366646000	3784410000	334262000
120	308351000	3472040000	283200000
130	262898000	3206930000	242979000
140	226827000	2979760000	210782000
150	197701000	2782640000	184586000
160	173844000	2609990000	162988000
170	154045000	2457280000	144958000
180	137457000	2321660000	129774000
190	123411000	2200220000	116857000
200	111413000	2090860000	105777000
300	49606300	1396420000	47904600
400	27929900	1048300000	27205000
500	17884700	839091000	17511400
600	12424700	699510000	12207800
700	9.13061e+06	599730000	8.99368e+06
800	6.99207e+06	524873000	6.90015e+06
900	5.52549e+06	466629000	5.46083e+06
1000	4.47616e+06	420014000	4.42896e+06

## Sheet: Figure 2e 
Figure 2e
d (nm)	1/d (nm-1)	ξMurray (hydrophobic graphene)	ξMurray (graphene)	ξMurray (hydrophilic graphene)
0.54	1.85185	133.163	36.4471	8.38458
0.56	1.78571	126.58	34.6479	7.98336
0.58	1.72414	123.375	33.7733	7.79416
0.615	1.62602	120.945	33.1126	7.66283
0.635	1.5748	119.865	32.8197	7.607
0.655	1.52672	118.784	32.5262	7.55081
0.675	1.48148	117.634	32.2139	7.49004
0.695	1.43885	116.288	31.8478	7.41649
0.715	1.3986	114.665	31.4058	7.32495
0.735	1.36054	112.735	30.8796	7.21344
0.755	1.3245	109.62	30.0287	7.02554
0.775	1.29032	104.373	28.5938	6.70017
0.795	1.25786	98.0227	26.8561	6.30271
0.815	1.22699	91.0537	24.9488	5.86409
0.835	1.1976	86.8613	23.8019	5.60312
0.855	1.16959	85.1208	23.3268	5.49969
0.875	1.14286	84.0647	23.0392	5.44017
0.895	1.11732	83.6495	22.9273	5.42198
0.915	1.0929	83.6145	22.9195	5.42838
0.935	1.06952	83.4701	22.8817	5.42764
0.955	1.04712	83.1468	22.7949	5.41522
0.975	1.02564	82.6611	22.6635	5.39213
0.995	1.00503	81.5008	22.3472	5.32485
1.015	0.98522	79.6233	21.8341	5.2104
1.02	0.98039	79.3497	21.7595	5.19454
1.04	0.96154	76.4821	20.9748	5.01469
1.06	0.9434	72.611	19.9148	4.76835
1.08	0.92593	69.6722	19.1102	4.58252
1.1	0.90909	67.3071	18.463	4.43388
1.12	0.89286	65.9095	18.081	4.34857
1.14	0.87719	65.3322	17.9241	4.31719
1.16	0.86207	64.8719	17.7992	4.29341
1.18	0.84746	64.6216	17.7319	4.28346
1.2	0.83333	64.5771	17.7211	4.28711
1.22	0.81967	64.3598	17.6629	4.27926
1.24	0.80645	63.9856	17.5616	4.26091
1.26	0.79365	63.5344	17.4391	4.23733
1.28	0.78125	62.4987	17.1562	4.17463
1.3	0.76923	60.9467	16.7315	4.07716
1.32	0.75758	59.3818	16.3032	3.97851
1.34	0.74627	57.3941	15.7587	3.85116
1.36	0.73529	55.7576	15.3106	3.747
1.38	0.72464	54.8616	15.0657	3.69235
1.4	0.71429	54.0792	14.8521	3.64517
1.42	0.70423	53.5893	14.7187	3.61756
1.44	0.69444	53.4204	14.6734	3.61155
1.46	0.68493	53.1934	14.6122	3.60157
1.48	0.67568	52.9924	14.5582	3.59331
1.5	0.66667	52.8807	14.5286	3.59106
1.52	0.65789	52.5313	14.4338	3.57261
1.54	0.64935	51.9918	14.2867	3.54115
1.56	0.64103	51.4122	14.1285	3.50683
1.58	0.63291	50.3674	13.8425	3.44062
1.6	0.625	49.1579	13.5111	3.36291
1.62	0.61728	48.2655	13.2669	3.3067
1.64	0.60976	47.3276	13.0101	3.24717
1.66	0.60241	46.641	12.8224	3.20472
1.68	0.59524	46.3098	12.7324	3.18658
1.7	0.58824	45.9563	12.6362	3.16683
1.72	0.5814	45.7006	12.5668	3.15376
1.74	0.57471	45.6079	12.5423	3.1519
1.76	0.56818	45.4035	12.4871	3.14229
1.78	0.5618	45.1624	12.4218	3.13008
1.8	0.55556	44.9726	12.3705	3.12138
1.82	0.54945	44.5385	12.2521	3.09566
1.84	0.54348	43.9484	12.0907	3.05899
1.86	0.53763	43.4067	11.9427	3.02558
1.88	0.53191	42.6266	11.7289	2.9754
1.9	0.52632	41.9076	11.532	2.92935
1.92	0.52083	41.4774	11.4145	2.90336
1.94	0.51546	41.0133	11.2877	2.87491
1.96	0.5102	40.6658	11.1929	2.85455
1.98	0.50505	40.5123	11.1516	2.84775
2	0.5	40.2934	11.0922	2.83631
2.02	0.49505	40.1003	11.0399	2.82664
2.04	0.4902	40.0062	11.0149	2.82393
2.06	0.48544	39.7829	10.9543	2.81205
2.08	0.48077	39.5027	10.878	2.7961
2.1	0.47619	39.2682	10.8142	2.78333
2.12	0.4717	38.827	10.6936	2.75584
2.14	0.46729	38.3132	10.5529	2.7231
2.16	0.46296	37.9283	10.4477	2.69943
2.18	0.45872	37.441	10.3143	2.66838
2.2	0.45455	37.0333	10.2028	2.64292
2.22	0.45045	36.8172	10.144	2.63106
2.24	0.44643	36.5496	10.0711	2.61547
2.26	0.44248	36.3323	10.012	2.60344
2.28	0.4386	36.2363	9.98634	2.60006
2.3	0.43478	36.0596	9.93842	2.59085
2.32	0.43103	35.8778	9.88909	2.58125
2.34	0.42735	35.7665	9.85919	2.57668
2.36	0.42373	35.5264	9.79378	2.5628
2.38	0.42017	35.235	9.71421	2.54517
2.4	0.41667	35.0044	9.6514	2.53187
2.42	0.41322	34.6307	9.5491	2.50815
2.44	0.40984	34.2554	9.44636	2.48425
2.46	0.4065	34.0188	9.38186	2.47035
2.48	0.40323	33.7181	9.29966	2.45173
2.5	0.4	33.4672	9.23119	2.43668
2.52	0.39683	33.3439	9.19788	2.43088
2.54	0.3937	33.16	9.14788	2.42063
2.56	0.39062	32.9947	9.10299	2.4117
2.58	0.3876	32.9142	9.08151	2.40894
2.6	0.38462	32.7489	9.03661	2.39995
2.62	0.38168	32.5667	8.98703	2.38969
2.64	0.37879	32.4439	8.95384	2.38374
2.66	0.37594	32.2069	8.88913	2.36938
2.68	0.37313	31.9406	8.81634	2.35281
2.7	0.37037	31.7523	8.76504	2.34193
2.72	0.36765	31.4734	8.68875	2.32433
2.74	0.36496	31.216	8.61835	2.30826
2.76	0.36232	31.0718	8.57921	2.30052
2.78	0.35971	30.8711	8.52447	2.28856
2.8	0.35714	30.6967	8.47697	2.27851
2.82	0.35461	30.613	8.45452	2.27517
2.84	0.35211	30.4659	8.41457	2.26709
2.86	0.34965	30.3217	8.3754	2.2592
2.88	0.34722	30.2433	8.35439	2.25618
2.9	0.34483	30.0826	8.31066	2.247
2.92	0.34247	29.9044	8.26207	2.23648
2.94	0.34014	29.7844	8.22956	2.23028
2.96	0.33784	29.573	8.17178	2.2172
2.98	0.33557	29.3542	8.11198	2.20353
3	0.33333	29.2175	8.07481	2.19598
3.02	0.33113	29.0163	8.01985	2.18355
3.04	0.32895	28.8346	7.97025	2.17255
3.06	0.3268	28.7404	7.94482	2.16811
3.08	0.32468	28.592	7.90442	2.15956
3.1	0.32258	28.4555	7.8673	2.15187
3.12	0.32051	28.3883	7.84936	2.14942
3.14	0.31847	28.2585	7.81408	2.14219
3.16	0.31646	28.1247	7.77767	2.13463
3.18	0.31447	28.0467	7.7567	2.13129
3.2	0.3125	27.8941	7.71511	2.12226
3.22	0.31056	27.7305	7.67046	2.11236
3.24	0.30864	27.6256	7.64205	2.1069
3.26	0.30675	27.4509	7.59431	2.09609
3.28	0.30488	27.2805	7.54776	2.08558
3.3	0.30303	27.184	7.52166	2.08069
3.32	0.3012	27.0343	7.48083	2.0717
3.34	0.2994	26.8973	7.44348	2.06364
3.36	0.29762	26.8289	7.42515	2.06085
3.38	0.29586	26.7084	7.39237	2.05402
3.4	0.29412	26.5918	7.36066	2.04746
3.42	0.2924	26.5317	7.34463	2.04525
3.44	0.2907	26.4122	7.31211	2.03844
3.46	0.28902	26.287	7.27801	2.03115
3.48	0.28736	26.2129	7.25806	2.0278
3.5	0.28571	26.0751	7.22048	2.0195
3.52	0.28409	25.9326	7.18159	2.01081
3.54	0.28249	25.8482	7.15875	2.00659
3.56	0.2809	25.7083	7.12058	1.99805
3.58	0.27933	25.5753	7.08429	1.99002
3.6	0.27778	25.5052	7.06543	1.98686
3.62	0.27624	25.3873	7.03332	1.97996
3.64	0.27473	25.2763	7.0031	1.97356
3.66	0.27322	25.2214	6.98844	1.97154
3.68	0.27174	25.1167	6.95999	1.96561
3.7	0.27027	25.0121	6.93152	1.95966
3.72	0.26882	24.9563	6.9166	1.95752
3.74	0.26738	24.8459	6.88656	1.95108
3.76	0.26596	24.7314	6.85534	1.94429
3.78	0.26455	24.6655	6.83761	1.94131
3.8	0.26316	24.5454	6.80485	1.93404
3.82	0.26178	24.4257	6.7722	1.92679
3.84	0.26042	24.3597	6.75442	1.92374
3.86	0.25907	24.2469	6.72367	1.91699
3.88	0.25773	24.1397	6.69445	1.91065
3.9	0.25641	24.0856	6.67999	1.9085
3.92	0.2551	23.9874	6.65326	1.90284
3.94	0.25381	23.8922	6.62737	1.8974
3.96	0.25253	23.8447	6.61471	1.89574
3.98	0.25126	23.7506	6.58912	1.89035
4	0.25	23.655	6.56312	1.88483
4.02	0.24876	23.6035	6.54935	1.8828
4.04	0.24752	23.5035	6.5221	1.87689
4.06	0.24631	23.4017	6.49435	1.87082
4.08	0.2451	23.3452	6.47918	1.86835
4.1	0.2439	23.2429	6.45129	1.8622
4.12	0.24272	23.1429	6.42403	1.85622
4.14	0.24155	23.0908	6.41008	1.85406
4.16	0.24038	22.9972	6.3846	1.84856
4.18	0.23923	22.9072	6.36011	1.84332
4.2	0.2381	22.8629	6.34829	1.84175
4.22	0.23697	22.7774	6.32504	1.83685
4.24	0.23585	22.6928	6.30204	1.832
4.26	0.23474	22.6501	6.29068	1.83053
4.28	0.23364	22.5645	6.26738	1.82557
4.3	0.23256	22.5195	6.25538	1.82388
4.32	0.23148	22.4314	6.23139	1.81869
4.34	0.23041	22.3423	6.20713	1.81341
4.36	0.22936	22.2947	6.19437	1.81147
4.38	0.22831	22.2058	6.17017	1.80617
4.4	0.22727	22.1187	6.14644	1.80099
4.42	0.22624	22.0744	6.13459	1.79929
4.44	0.22523	21.9917	6.11209	1.79444
4.46	0.22422	21.9114	6.09026	1.78978
4.48	0.22321	21.8722	6.07984	1.78846
4.5	0.22222	21.795	6.05885	1.78402
4.52	0.22124	21.7186	6.03806	1.77963
4.54	0.22026	21.6805	6.02793	1.77837
4.56	0.2193	21.6034	6.00698	1.7739
4.58	0.21834	21.5257	5.98584	1.76936
4.6	0.21739	21.4856	5.97516	1.76791
4.62	0.21645	21.4069	5.95373	1.76326
4.64	0.21552	21.3282	5.93231	1.7586
4.66	0.21459	21.2879	5.92155	1.75709
4.68	0.21368	21.211	5.90062	1.75255
4.7	0.21277	21.1358	5.88016	1.74813
4.72	0.21186	21.0988	5.87033	1.74687
4.74	0.21097	21.0268	5.85074	1.74269
4.76	0.21008	20.9561	5.83153	1.73862
4.78	0.20921	20.922	5.82247	1.73755
4.8	0.20833	20.8526	5.80361	1.73356
4.82	0.20747	20.7833	5.78477	1.72955
4.84	0.20661	20.7489	5.77565	1.72845
4.86	0.20576	20.679	5.75665	1.72438
4.88	0.20492	20.609	5.7376	1.72028
4.9	0.20408	20.5737	5.72821	1.71906
4.92	0.20325	20.5036	5.70915	1.71494
4.94	0.20243	20.4343	5.69028	1.71085
4.96	0.20161	20.4	5.68119	1.7097
4.98	0.2008	20.3327	5.66286	1.70576
5	0.2	20.2666	5.6449	1.70192
5.1	0.19608	20.0139	5.57667	1.68907
5.2	0.19231	19.7628	5.50886	1.67612
5.3	0.18868	19.4906	5.43508	1.66111
5.4	0.18519	19.2624	5.37353	1.64961
5.5	0.18182	19.0365	5.31257	1.63808
5.6	0.17857	18.7924	5.24647	1.62476
5.7	0.17544	18.5851	5.19059	1.61439
5.8	0.17241	18.3813	5.13566	1.60414
5.9	0.16949	18.1602	5.07584	1.59217
6	0.16667	17.9711	5.02492	1.5828
6.1	0.16393	17.7864	4.9752	1.57365
6.2	0.16129	17.5845	4.92061	1.56278
6.3	0.15873	17.4115	4.87408	1.55431
6.4	0.15625	17.2432	4.82883	1.54609
6.5	0.15385	17.0577	4.77873	1.53616
6.6	0.15152	16.899	4.73608	1.52848
6.7	0.14925	16.7447	4.69466	1.52105
6.8	0.14706	16.5736	4.64846	1.51194
6.9	0.14493	16.4275	4.60924	1.50496
7	0.14286	16.2854	4.57114	1.49821
7.1	0.14085	16.1269	4.52839	1.48981
7.2	0.13889	15.9919	4.4922	1.48344
7.3	0.13699	15.8604	4.45697	1.47727
7.4	0.13514	15.7132	4.41729	1.46951
7.5	0.13333	15.588	4.38377	1.46368
7.6	0.13158	15.4659	4.35109	1.45802
7.7	0.12987	15.3287	4.31415	1.45082
7.8	0.12821	15.2122	4.283	1.44547
7.9	0.12658	15.0984	4.25257	1.44026
8	0.125	14.9702	4.21808	1.43357
8.1	0.12346	14.8615	4.18904	1.42863
8.2	0.12195	14.7551	4.16063	1.42382
8.3	0.12048	14.635	4.12835	1.41758
8.4	0.11905	14.5332	4.10119	1.41302
8.5	0.11765	14.4335	4.0746	1.40856
8.6	0.11628	14.3357	4.04854	1.4042
8.7	0.11494	14.2252	4.01884	1.39849
8.8	0.11364	14.1315	3.99388	1.39435
8.9	0.11236	14.0396	3.96941	1.39031
9	0.11111	13.9354	3.94146	1.38496
9.1	0.10989	13.8471	3.91798	1.3811
9.2	0.1087	13.7605	3.89496	1.37733
9.3	0.10753	13.6622	3.86858	1.37231
9.4	0.10638	13.5789	3.84645	1.36871
9.5	0.10526	13.4971	3.82473	1.36519
9.6	0.10417	13.4041	3.7998	1.36046
9.7	0.10309	13.3253	3.7789	1.3571
9.8	0.10204	13.2479	3.75838	1.35381
9.9	0.10101	13.1597	3.73476	1.34934
10	0.1	13.0851	3.71499	1.34619
10.1	0.09901	13.0118	3.69555	1.34311
10.2	0.09804	12.928	3.67314	1.33888
10.3	0.09709	12.8572	3.6544	1.33593
10.4	0.09615	12.7875	3.63597	1.33303
10.5	0.09524	12.7078	3.61467	1.32903
10.6	0.09434	12.6405	3.59688	1.32625
10.7	0.09346	12.5743	3.57937	1.32353
10.8	0.09259	12.4984	3.55909	1.31973
10.9	0.09174	12.4343	3.54217	1.31712
11	0.09091	12.3712	3.52552	1.31455
11.1	0.09009	12.2988	3.50619	1.31094
11.2	0.08929	12.2376	3.49007	1.30847
11.3	0.0885	12.1774	3.4742	1.30605
11.4	0.08772	12.1082	3.45575	1.30262
11.5	0.08696	12.0499	3.44039	1.30029
11.6	0.08621	11.9924	3.42525	1.298
11.7	0.08547	11.9262	3.40761	1.29473
11.8	0.08475	11.8704	3.39294	1.29253
11.9	0.08403	11.8154	3.37847	1.29036
12	0.08333	11.752	3.3616	1.28723
12.1	0.08264	11.6986	3.34757	1.28515
12.2	0.08197	11.6459	3.33373	1.2831
12.3	0.0813	11.5851	3.31757	1.28011
12.4	0.08065	11.5339	3.30414	1.27814
12.5	0.08	11.4834	3.29089	1.27619
12.6	0.07937	11.4251	3.27538	1.27333
12.7	0.07874	11.376	3.26251	1.27146
12.8	0.07812	11.3275	3.24981	1.26961
12.9	0.07752	11.2796	3.23728	1.26779
13	0.07692	11.2242	3.22258	1.26509
13.1	0.07634	11.1777	3.21039	1.26333
13.2	0.07576	11.1317	3.19836	1.2616
13.3	0.07519	11.0784	3.18423	1.25901
13.4	0.07463	11.0336	3.17252	1.25734
13.5	0.07407	10.9893	3.16096	1.25569
13.6	0.07353	10.938	3.14736	1.2532
13.7	0.07299	10.8948	3.13611	1.25161
13.8	0.07246	10.8522	3.12499	1.25004
13.9	0.07194	10.8027	3.11189	1.24765
14	0.07143	10.7612	3.10106	1.24613
14.1	0.07092	10.7201	3.09036	1.24463
14.2	0.07042	10.6724	3.07773	1.24233
14.3	0.06993	10.6323	3.0673	1.24088
14.4	0.06944	10.5927	3.05699	1.23945
14.5	0.06897	10.5466	3.0448	1.23723
14.6	0.06849	10.5079	3.03475	1.23585
14.7	0.06803	10.4696	3.02481	1.23448
14.8	0.06757	10.4251	3.01304	1.23234
14.9	0.06711	10.3878	3.00334	1.23102
15	0.06667	10.3508	2.99375	1.22971
15.1	0.06623	10.3077	2.98238	1.22765
15.2	0.06579	10.2716	2.97302	1.22638
15.3	0.06536	10.2359	2.96376	1.22513
15.4	0.06494	10.1942	2.95277	1.22314
15.5	0.06452	10.1592	2.94372	1.22193
15.6	0.0641	10.1247	2.93477	1.22073
15.7	0.06369	10.0843	2.92413	1.21881
15.8	0.06329	10.0505	2.91539	1.21765
15.9	0.06289	10.017	2.90673	1.2165
16	0.0625	9.97788	2.89643	1.21464
16.1	0.06211	9.94511	2.88797	1.21352
16.2	0.06173	9.91267	2.8796	1.21242
16.3	0.06135	9.87475	2.86962	1.21062
16.4	0.06098	9.84299	2.86143	1.20955
16.5	0.06061	9.81154	2.85332	1.20849
16.6	0.06024	9.77475	2.84365	1.20675
16.7	0.05988	9.74394	2.83571	1.20572
16.8	0.05952	9.71343	2.82786	1.20471
16.9	0.05917	9.67772	2.81848	1.20302
17	0.05882	9.64782	2.81079	1.20203
17.1	0.05848	9.61821	2.80317	1.20106
17.2	0.05814	9.58887	2.79563	1.20009
17.3	0.0578	9.55449	2.78661	1.19847
17.4	0.05747	9.52573	2.77922	1.19753
17.5	0.05714	9.49723	2.7719	1.1966
17.6	0.05682	9.46381	2.76314	1.19503
17.7	0.0565	9.43586	2.75597	1.19412
17.8	0.05618	9.40816	2.74887	1.19323
17.9	0.05587	9.37566	2.74036	1.1917
18	0.05556	9.34849	2.7334	1.19083
18.1	0.05525	9.32156	2.7265	1.18997
18.2	0.05495	9.28994	2.71823	1.18849
18.3	0.05464	9.26351	2.71147	1.18765
18.4	0.05435	9.2373	2.70476	1.18682
18.5	0.05405	9.20652	2.69671	1.18538
18.6	0.05376	9.1808	2.69014	1.18457
18.7	0.05348	9.1553	2.68363	1.18377
18.8	0.05319	9.12532	2.6758	1.18237
18.9	0.05291	9.10027	2.6694	1.18159
19	0.05263	9.07544	2.66307	1.18082
19.1	0.05236	9.04623	2.65544	1.17946
19.2	0.05208	9.02183	2.64923	1.1787
19.3	0.05181	8.99764	2.64306	1.17796
19.4	0.05155	8.96916	2.63564	1.17663
19.5	0.05128	8.94539	2.62958	1.17591
19.6	0.05102	8.92181	2.62359	1.17519
19.7	0.05076	8.89404	2.61635	1.1739
19.8	0.05051	8.87087	2.61046	1.17319
19.9	0.05025	8.84788	2.60461	1.1725
20	0.05	8.82079	2.59756	1.17124
30	0.03333	7.09897	2.16347	1.11372
40	0.025	6.10977	1.92283	1.08475
50	0.02	5.45121	1.76807	1.06761
60	0.01667	4.97161	1.65881	1.056
70	0.01429	4.60393	1.57759	1.04787
80	0.0125	4.30971	1.51433	1.04164
90	0.01111	4.06793	1.4637	1.03679
100	0.01	3.8652	1.42235	1.03302
110	0.00909	3.69146	1.38769	1.02984
120	0.00833	3.54106	1.3584	1.02728
130	0.00769	3.40875	1.33312	1.02503
140	0.00714	3.29169	1.31124	1.02318
150	0.00667	3.18678	1.29197	1.02151
160	0.00625	3.09247	1.275	1.02011
170	0.00588	3.00676	1.2598	1.01881
180	0.00556	2.92862	1.24617	1.01766
190	0.00526	2.85716	1.23394	1.01668
200	0.005	2.79122	1.22279	1.01575
300	0.00333	2.3338	1.15046	1.01003
400	0.0025	2.06949	1.11291	1.00714
500	0.002	1.89424	1.08993	1.00543
600	0.00167	1.76826	1.07438	1.00427
700	0.00143	1.67282	1.06318	1.00346
800	0.00125	1.5977	1.0547	1.00284
900	0.00111	1.53689	1.04808	1.00235
1000	0.001	1.48659	1.04276	1.00198

## Sheet: Figure 2g
Figure 2e
Silica (hydrophilic treated)				Silica (hydrophobic treated)
d (nm)	1/d (nm-1)	Rbulk/Rexp		d (nm)	1/d (nm-1)	Rbulk/Rexp
47.824	0.02091	1.78909		45.0857	0.02218	1.27386
42.735	0.0234	1.79804		40.016	0.02499	1.26843
37.7929	0.02646	1.80039		35.1124	0.02848	1.26926
32.8839	0.03041	1.79157		30.4136	0.03288	1.27308
28.2247	0.03543	1.82416		25.7732	0.0388	1.2712
23.7699	0.04207	1.85773		21.4961	0.04652	1.30874
19.5771	0.05108	1.78452		17.4125	0.05743	1.34461
15.7011	0.06369	1.68297		13.7118	0.07293	1.2833
12.0627	0.0829	1.63362		10.3972	0.09618	1.18823
10.4384	0.0958	1.64418		8.99281	0.1112	1.15875
8.00064	0.12499	1.65155		7.58956	0.13176	1.14404
6.37592	0.15684	1.67817		6.18544	0.16167	1.15897
4.75082	0.21049	1.7883		5.48366	0.18236	1.16359
3.93825	0.25392	1.86539		4.78171	0.20913	1.15713
3.12578	0.31992	1.99946		4.07997	0.2451	1.16179
2.31326	0.43229	2.21605		3.37804	0.29603	1.22831
1.50078	0.66632	2.57797		2.67609	0.37368	1.41145
0.688302	1.45285	6.70877		1.97422	0.50653	1.62006

## Sheet: Figure 3d
Figure 3d
Ni	R1 (Pa·s/kg)	R2 (Pa·s/kg)	Rhiera (Pa·s/kg)
1	21607900000	2131630000000	2153240000000
2	22439000000	681114000000	703553000000
3	23270000000	372791000000	396061000000
4	24101100000	251476000000	275577000000
5	24932200000	189198000000	214130000000
6	25763300000	152059000000	177823000000
7	26594300000	127677000000	154271000000
8	27425400000	110563000000	137988000000
9	28256500000	97947100000	126204000000
10	29087600000	88292500000	117380000000
11	29918600000	80682900000	110602000000
12	30749700000	74540600000	105290000000
13	31580800000	69484600000	101065000000
14	32411800000	65254100000	97665900000
15	33242900000	61664600000	94907500000
16	34074000000	58582500000	92656500000
17	34905100000	55908400000	90813500000
18	35736100000	53567200000	89303400000
19	36567200000	51501100000	88068300000
20	37398300000	49664500000	87062800000
21	38229400000	48021700000	86251100000
22	39060400000	46543800000	85604200000
23	39891500000	45207300000	85098800000
24	40722600000	43993000000	84715500000
25	41553600000	42884900000	84438600000
26	42384700000	41869900000	84254600000
27	43215800000	40936700000	84152500000
28	44046900000	40075900000	84122800000
29	44877900000	39279400000	84157400000
30	45709000000	38540400000	84249400000
31	46540100000	37852800000	84392900000
32	47371200000	37211500000	84582600000
33	48202200000	36611900000	84814100000
34	49033300000	36050200000	85083500000
35	49864400000	35522900000	85387300000
36	50695500000	35027000000	85722400000
37	51526500000	34559700000	86086200000
38	52357600000	34118600000	86476200000
39	53188700000	33701600000	86890300000
40	54019700000	33306800000	87326500000
41	54850800000	32932400000	87783200000
42	55681900000	32577000000	88258900000
43	56513000000	32239100000	88752000000
44	57344000000	31917400000	89261500000
45	58175100000	31610900000	89786000000
46	59006200000	31318400000	90324600000
47	59837300000	31039100000	90876400000
48	60668300000	30772100000	91440400000
49	61499400000	30516500000	92015900000
50	62330500000	30271700000	92602200000
51	63161500000	30037000000	93198600000
52	63992600000	29811800000	93804400000
53	64823700000	29595500000	94419200000
54	65654800000	29387600000	95042300000
55	66485800000	29187600000	95673400000
56	67316900000	28995100000	96312000000
57	68148000000	28809700000	96957700000
58	68979100000	28631000000	97610000000
59	69810100000	28458500000	98268700000
60	70641200000	28292100000	98933300000
61	71472300000	28131400000	99603700000
62	72303400000	27976100000	100279000000
63	73134400000	27826000000	100960000000
64	73965500000	27680700000	101646000000
65	74796600000	27540100000	102337000000
66	75627600000	27403900000	103032000000
67	76458700000	27272000000	103731000000
68	77289800000	27144100000	104434000000
69	78120900000	27020000000	105141000000
70	78951900000	26899600000	105852000000
71	79783000000	26782800000	106566000000
72	80614100000	26669300000	107283000000
73	81445200000	26559000000	108004000000
74	82276200000	26451800000	108728000000
75	83107300000	26347600000	109455000000
76	83938400000	26246200000	110185000000
77	84769400000	26147600000	110917000000
78	85600500000	26051600000	111652000000
79	86431600000	25958000000	112390000000
80	87262700000	25866900000	113130000000
81	88093700000	25778200000	113872000000
82	88924800000	25691600000	114616000000
83	89755900000	25607300000	115363000000
84	90587000000	25525000000	116112000000
85	91418000000	25444700000	116863000000
86	92249100000	25366300000	117615000000
87	93080200000	25289800000	118370000000
88	93911200000	25215000000	119126000000
89	94742300000	25142000000	119884000000
90	95573400000	25070700000	120644000000
91	96404500000	25001000000	121405000000
92	97235500000	24932900000	122168000000
93	98066600000	24866200000	122933000000
94	98897700000	24801000000	123699000000
95	99728800000	24737300000	124466000000
96	100560000000	24674900000	125235000000
97	101391000000	24613800000	126005000000
98	102222000000	24554000000	126776000000
99	103053000000	24495500000	127549000000
100	103884000000	24438100000	128322000000
101	104715000000	24381900000	129097000000
102	105546000000	24326900000	129873000000
103	106377000000	24272900000	130650000000
104	107208000000	24220000000	131428000000
105	108039000000	24168200000	132208000000
106	108871000000	24117300000	132988000000
107	109702000000	24067500000	133769000000
108	110533000000	24018500000	134551000000
109	111364000000	23970500000	135334000000
110	112195000000	23923400000	136118000000
111	113026000000	23877200000	136903000000
112	113857000000	23831800000	137689000000
113	114688000000	23787200000	138475000000
114	115519000000	23743400000	139263000000
115	116350000000	23700400000	140051000000
116	117181000000	23658200000	140840000000
117	118012000000	23616700000	141629000000
118	118843000000	23576000000	142419000000
119	119675000000	23535900000	143210000000
120	120506000000	23496500000	144002000000
121	121337000000	23457800000	144794000000
122	122168000000	23419700000	145587000000
123	122999000000	23382300000	146381000000
124	123830000000	23345400000	147175000000
125	124661000000	23309200000	147970000000
126	125492000000	23273600000	148766000000
127	126323000000	23238500000	149562000000
128	127154000000	23204000000	150358000000
129	127985000000	23170100000	151155000000
130	128816000000	23136700000	151953000000
131	129647000000	23103800000	152751000000
132	130478000000	23071400000	153550000000
133	131310000000	23039500000	154349000000
134	132141000000	23008100000	155149000000
135	132972000000	22977200000	155949000000
136	133803000000	22946700000	156749000000
137	134634000000	22916700000	157551000000
138	135465000000	22887100000	158352000000
139	136296000000	22858000000	159154000000
140	137127000000	22829300000	159956000000
141	137958000000	22801000000	160759000000
142	138789000000	22773100000	161562000000
143	139620000000	22745600000	162366000000
144	140451000000	22718500000	163170000000
145	141282000000	22691800000	163974000000
146	142113000000	22665400000	164779000000
147	142945000000	22639500000	165584000000
148	143776000000	22613800000	166389000000
149	144607000000	22588600000	167195000000
150	145438000000	22563600000	168001000000
151	146269000000	22539000000	168808000000
152	147100000000	22514800000	169615000000
153	147931000000	22490800000	170422000000
154	148762000000	22467200000	171229000000
155	149593000000	22443900000	172037000000
156	150424000000	22420900000	172845000000
157	151255000000	22398200000	173653000000
158	152086000000	22375800000	174462000000
159	152917000000	22353600000	175271000000
160	153749000000	22331800000	176080000000
161	154580000000	22310200000	176890000000
162	155411000000	22288900000	177700000000
163	156242000000	22267900000	178510000000
164	157073000000	22247100000	179320000000
165	157904000000	22226600000	180130000000
166	158735000000	22206300000	180941000000
167	159566000000	22186300000	181752000000
168	160397000000	22166500000	182564000000
169	161228000000	22147000000	183375000000
170	162059000000	22127700000	184187000000
171	162890000000	22108600000	184999000000
172	163721000000	22089800000	185811000000
173	164552000000	22071100000	186624000000
174	165384000000	22052700000	187436000000
175	166215000000	22034500000	188249000000
176	167046000000	22016500000	189062000000
177	167877000000	21998700000	189875000000
178	168708000000	21981200000	190689000000
179	169539000000	21963800000	191503000000
180	170370000000	21946600000	192317000000
181	171201000000	21929600000	193131000000
182	172032000000	21912800000	193945000000
183	172863000000	21896200000	194759000000
184	173694000000	21879800000	195574000000
185	174525000000	21863500000	196389000000
186	175356000000	21847400000	197204000000
187	176187000000	21831600000	198019000000
188	177019000000	21815800000	198834000000
189	177850000000	21800300000	199650000000
190	178681000000	21784900000	200466000000
191	179512000000	21769600000	201281000000
192	180343000000	21754600000	202097000000
193	181174000000	21739700000	202914000000
194	182005000000	21724900000	203730000000
195	182836000000	21710300000	204546000000
196	183667000000	21695900000	205363000000
197	184498000000	21681600000	206180000000
198	185329000000	21667400000	206997000000
199	186160000000	21653400000	207814000000
200	186991000000	21639500000	208631000000

## Sheet: Figure 3e
Figure 3e
Untreated graphene		Hydrophobic graphene		Hydrophilic graphene
R1/R2	Q (kg/s)	R1/R2	Q (kg/s)	R1/R2	Q (kg/s)
0.01014	4.64416e-08	0.01135	9.66246e-07	0.00797	5.82324e-09
0.03294	1.42136e-07	0.0369	2.94949e-06	0.02592	1.79059e-08
0.06242	2.52487e-07	0.06991	5.22263e-06	0.0491	3.19922e-08
0.09584	3.62875e-07	0.10734	7.48039e-06	0.07539	4.62662e-08
0.13178	4.67005e-07	0.1476	9.59393e-06	0.10366	5.99202e-08
0.16943	5.62358e-07	0.18977	1.1514e-05	0.13328	7.26066e-08
0.20829	6.4821e-07	0.2333	1.32289e-05	0.16385	8.42009e-08
0.24805	7.247e-07	0.27783	1.47442e-05	0.19513	9.46898e-08
0.28849	7.92371e-07	0.32312	1.60736e-05	0.22694	1.04115e-07
0.32945	8.51933e-07	0.369	1.72337e-05	0.25916	1.12544e-07
0.37082	9.04147e-07	0.41533	1.82416e-05	0.2917	1.20056e-07
0.41252	9.49755e-07	0.46205	1.91139e-05	0.32451	1.2673e-07
0.4545	9.89458e-07	0.50906	1.98658e-05	0.35753	1.32644e-07
0.4967	1.0239e-06	0.55633	2.05113e-05	0.39073	1.37872e-07
0.53909	1.05366e-06	0.60381	2.10627e-05	0.42408	1.42481e-07
0.58164	1.07926e-06	0.65147	2.15311e-05	0.45755	1.46533e-07
0.62433	1.10116e-06	0.69928	2.19261e-05	0.49112	1.50085e-07
0.66713	1.11978e-06	0.74722	2.22565e-05	0.52479	1.53185e-07
0.71003	1.13548e-06	0.79527	2.25298e-05	0.55854	1.55881e-07
0.75302	1.1486e-06	0.84342	2.27527e-05	0.59236	1.58212e-07
0.79608	1.15941e-06	0.89166	2.2931e-05	0.62624	1.60216e-07
0.83922	1.16817e-06	0.93997	2.307e-05	0.66017	1.61925e-07
0.88241	1.1751e-06	0.98835	2.31741e-05	0.69415	1.63368e-07
0.92566	1.18042e-06	1.03679	2.32474e-05	0.72817	1.64573e-07
0.96896	1.18429e-06	1.08528	2.32935e-05	0.76223	1.65562e-07
1.0123	1.18688e-06	1.13382	2.33154e-05	0.79632	1.66357e-07
1.05567	1.18832e-06	1.18241	2.3316e-05	0.83044	1.66978e-07
1.09909	1.18874e-06	1.23103	2.32978e-05	0.86459	1.6744e-07
1.14253	1.18825e-06	1.27969	2.32628e-05	0.89877	1.67761e-07
1.186	1.18695e-06	1.32838	2.32131e-05	0.93297	1.67953e-07
1.2295	1.18493e-06	1.37711	2.31503e-05	0.96718	1.68029e-07
1.27303	1.18228e-06	1.42585	2.30761e-05	1.00142	1.68001e-07
1.31657	1.17905e-06	1.47463	2.29917e-05	1.03568	1.67879e-07
1.36014	1.17532e-06	1.52342	2.28984e-05	1.06995	1.67672e-07
1.40372	1.17113e-06	1.57224	2.27973e-05	1.10423	1.67388e-07
1.44733	1.16656e-06	1.62108	2.26893e-05	1.13853	1.67035e-07
1.49094	1.16163e-06	1.66993	2.25753e-05	1.17285	1.66621e-07
1.53458	1.15639e-06	1.71881	2.24561e-05	1.20717	1.6615e-07
1.57822	1.15088e-06	1.76769	2.23324e-05	1.2415	1.65629e-07
1.62188	1.14513e-06	1.81659	2.22048e-05	1.27585	1.65063e-07
1.66556	1.13917e-06	1.86551	2.20738e-05	1.3102	1.64457e-07
1.70924	1.13303e-06	1.91444	2.19401e-05	1.34457	1.63815e-07
1.75293	1.12673e-06	1.96338	2.18039e-05	1.37894	1.6314e-07
1.79664	1.1203e-06	2.01233	2.16657e-05	1.41332	1.62437e-07
1.84035	1.11376e-06	2.06129	2.1526e-05	1.4477	1.61708e-07
1.88407	1.10712e-06	2.11026	2.13849e-05	1.4821	1.60956e-07
1.9278	1.1004e-06	2.15924	2.12428e-05	1.5165	1.60185e-07
1.97154	1.09361e-06	2.20822	2.11e-05	1.5509	1.59395e-07
2.01528	1.08677e-06	2.25722	2.09566e-05	1.58531	1.58591e-07
2.05903	1.07989e-06	2.30622	2.0813e-05	1.61973	1.57773e-07
2.10279	1.07298e-06	2.35523	2.06692e-05	1.65415	1.56944e-07
2.14655	1.06605e-06	2.40425	2.05255e-05	1.68858	1.56105e-07
2.19032	1.05911e-06	2.45328	2.0382e-05	1.72301	1.55257e-07
2.2341	1.05216e-06	2.50231	2.02388e-05	1.75745	1.54403e-07
2.27788	1.04522e-06	2.55134	2.00961e-05	1.79189	1.53543e-07
2.32166	1.03829e-06	2.60038	1.9954e-05	1.82633	1.52679e-07
2.36545	1.03138e-06	2.64943	1.98125e-05	1.86078	1.51811e-07
2.40925	1.02449e-06	2.69848	1.96718e-05	1.89523	1.50941e-07
2.45305	1.01762e-06	2.74754	1.95319e-05	1.92968	1.5007e-07
2.49685	1.01078e-06	2.7966	1.93929e-05	1.96414	1.49198e-07
2.54066	1.00398e-06	2.84566	1.92549e-05	1.9986	1.48326e-07
2.58446	9.97213e-07	2.89473	1.91178e-05	2.03306	1.47455e-07
2.62828	9.90487e-07	2.94381	1.89818e-05	2.06753	1.46585e-07
2.6721	9.83805e-07	2.99288	1.88469e-05	2.10199	1.45716e-07
2.71592	9.77167e-07	3.04196	1.87131e-05	2.13646	1.44851e-07
2.75974	9.70576e-07	3.09105	1.85804e-05	2.17094	1.43988e-07
2.80356	9.64035e-07	3.14014	1.8449e-05	2.20541	1.43129e-07
2.84739	9.57544e-07	3.18923	1.83187e-05	2.23989	1.42273e-07
2.89122	9.51105e-07	3.23832	1.81897e-05	2.27437	1.41421e-07
2.93506	9.44719e-07	3.28742	1.80618e-05	2.30885	1.40573e-07
2.97889	9.38388e-07	3.33651	1.79352e-05	2.34334	1.39731e-07
3.02273	9.32111e-07	3.38562	1.78099e-05	2.37782	1.38893e-07
3.06657	9.2589e-07	3.43472	1.76858e-05	2.41231	1.3806e-07
3.11042	9.19726e-07	3.48383	1.7563e-05	2.4468	1.37232e-07
3.15426	9.13618e-07	3.53294	1.74414e-05	2.48129	1.3641e-07
3.19811	9.07568e-07	3.58205	1.73212e-05	2.51578	1.35593e-07
3.24196	9.01575e-07	3.63116	1.72021e-05	2.55028	1.34782e-07
3.28581	8.95639e-07	3.68028	1.70843e-05	2.58477	1.33977e-07
3.32967	8.89762e-07	3.7294	1.69678e-05	2.61927	1.33178e-07
3.37352	8.83942e-07	3.77852	1.68525e-05	2.65377	1.32386e-07
3.41738	8.7818e-07	3.82764	1.67385e-05	2.68827	1.31599e-07
3.46123	8.72475e-07	3.87676	1.66257e-05	2.72277	1.30818e-07
3.50509	8.66828e-07	3.92589	1.65141e-05	2.75727	1.30044e-07
3.54896	8.61238e-07	3.97501	1.64038e-05	2.79177	1.29276e-07
3.59282	8.55705e-07	4.02414	1.62946e-05	2.82628	1.28515e-07
3.63668	8.50229e-07	4.07327	1.61867e-05	2.86078	1.2776e-07
3.68055	8.44809e-07	4.1224	1.608e-05	2.89529	1.27011e-07
3.72442	8.39445e-07	4.17154	1.59744e-05	2.9298	1.26269e-07
3.76828	8.34137e-07	4.22067	1.587e-05	2.96431	1.25533e-07
3.81215	8.28884e-07	4.26981	1.57667e-05	2.99882	1.24804e-07
3.85602	8.23686e-07	4.31894	1.56646e-05	3.03333	1.24081e-07
3.8999	8.18542e-07	4.36808	1.55637e-05	3.06784	1.23365e-07
3.94377	8.13452e-07	4.41722	1.54638e-05	3.10235	1.22655e-07
3.98764	8.08416e-07	4.46636	1.53651e-05	3.13686	1.21951e-07
4.03152	8.03432e-07	4.51551	1.52674e-05	3.17138	1.21254e-07
4.07539	7.98501e-07	4.56465	1.51709e-05	3.20589	1.20563e-07
4.11927	7.93621e-07	4.61379	1.50754e-05	3.24041	1.19878e-07
4.16315	7.88793e-07	4.66294	1.49809e-05	3.27493	1.192e-07
4.20703	7.84015e-07	4.71209	1.48875e-05	3.30944	1.18528e-07
4.25091	7.79288e-07	4.76123	1.47952e-05	3.34396	1.17862e-07
4.29479	7.74611e-07	4.81038	1.47038e-05	3.37848	1.17202e-07
4.33867	7.69982e-07	4.85953	1.46135e-05	3.413	1.16549e-07
4.38255	7.65402e-07	4.90868	1.45241e-05	3.44752	1.15901e-07
4.42644	7.6087e-07	4.95783	1.44358e-05	3.48204	1.15259e-07
4.47032	7.56386e-07	5.00699	1.43484e-05	3.51656	1.14624e-07
4.5142	7.51948e-07	5.05614	1.42619e-05	3.55108	1.13994e-07
4.55809	7.47557e-07	5.10529	1.41764e-05	3.5856	1.1337e-07
4.60198	7.43211e-07	5.15445	1.40918e-05	3.62013	1.12753e-07
4.64586	7.38911e-07	5.20361	1.40082e-05	3.65465	1.1214e-07
4.68975	7.34655e-07	5.25276	1.39254e-05	3.68918	1.11534e-07
4.73364	7.30444e-07	5.30192	1.38436e-05	3.7237	1.10933e-07
4.77753	7.26276e-07	5.35108	1.37626e-05	3.75823	1.10338e-07
4.82142	7.22151e-07	5.40024	1.36825e-05	3.79275	1.09748e-07
4.86531	7.18068e-07	5.44939	1.36032e-05	3.82728	1.09164e-07
4.9092	7.14027e-07	5.49855	1.35248e-05	3.8618	1.08586e-07
4.95309	7.10028e-07	5.54772	1.34472e-05	3.89633	1.08013e-07
4.99698	7.0607e-07	5.59688	1.33704e-05	3.93086	1.07445e-07
5.04088	7.02152e-07	5.64604	1.32945e-05	3.96539	1.06882e-07
5.08477	6.98273e-07	5.6952	1.32193e-05	3.99991	1.06325e-07
5.12866	6.94434e-07	5.74436	1.3145e-05	4.03444	1.05772e-07
5.17256	6.90634e-07	5.79353	1.30714e-05	4.06897	1.05225e-07
5.21645	6.86872e-07	5.84269	1.29986e-05	4.1035	1.04683e-07
5.26035	6.83148e-07	5.89186	1.29265e-05	4.13803	1.04146e-07
5.30424	6.79462e-07	5.94102	1.28552e-05	4.17256	1.03614e-07
5.34814	6.75812e-07	5.99019	1.27846e-05	4.20709	1.03087e-07
5.39203	6.72198e-07	6.03936	1.27147e-05	4.24162	1.02565e-07
5.43593	6.68621e-07	6.08852	1.26456e-05	4.27616	1.02047e-07
5.47983	6.65078e-07	6.13769	1.25771e-05	4.31069	1.01534e-07
5.52373	6.61571e-07	6.18686	1.25094e-05	4.34522	1.01026e-07
5.56763	6.58098e-07	6.23603	1.24424e-05	4.37975	1.00523e-07
5.61152	6.5466e-07	6.2852	1.2376e-05	4.41429	1.00024e-07
5.65542	6.51254e-07	6.33436	1.23103e-05	4.44882	9.95293e-08
5.69932	6.47882e-07	6.38353	1.22452e-05	4.48335	9.90393e-08
5.74322	6.44543e-07	6.4327	1.21808e-05	4.51789	9.85538e-08
5.78712	6.41236e-07	6.48188	1.2117e-05	4.55242	9.80727e-08
5.83102	6.37961e-07	6.53105	1.20539e-05	4.58695	9.75959e-08
5.87493	6.34717e-07	6.58022	1.19914e-05	4.62149	9.71234e-08
5.91883	6.31504e-07	6.62939	1.19295e-05	4.65602	9.6655e-08
5.96273	6.28322e-07	6.67856	1.18682e-05	4.69056	9.61909e-08
6.00663	6.25171e-07	6.72773	1.18075e-05	4.72509	9.57309e-08
6.05053	6.22049e-07	6.77691	1.17474e-05	4.75963	9.52749e-08
6.09444	6.18956e-07	6.82608	1.16879e-05	4.79417	9.4823e-08
6.13834	6.15893e-07	6.87525	1.1629e-05	4.8287	9.43751e-08
6.18224	6.12858e-07	6.92443	1.15706e-05	4.86324	9.39311e-08
6.22615	6.09852e-07	6.9736	1.15128e-05	4.89778	9.3491e-08
6.27005	6.06874e-07	7.02278	1.14555e-05	4.93231	9.30548e-08
6.31395	6.03923e-07	7.07195	1.13988e-05	4.96685	9.26223e-08
6.35786	6.01e-07	7.12113	1.13426e-05	5.00139	9.21936e-08
6.40176	5.98103e-07	7.1703	1.12869e-05	5.03592	9.17686e-08
6.44567	5.95233e-07	7.21948	1.12318e-05	5.07046	9.13473e-08
6.48957	5.92389e-07	7.26866	1.11772e-05	5.105	9.09297e-08
6.53348	5.89572e-07	7.31783	1.11231e-05	5.13954	9.05156e-08
6.57739	5.86779e-07	7.36701	1.10695e-05	5.17408	9.0105e-08
6.62129	5.84012e-07	7.41619	1.10164e-05	5.20862	8.9698e-08
6.6652	5.8127e-07	7.46536	1.09638e-05	5.24315	8.92944e-08
6.70911	5.78553e-07	7.51454	1.09116e-05	5.27769	8.88942e-08
6.75301	5.75859e-07	7.56372	1.086e-05	5.31223	8.84975e-08
6.79692	5.7319e-07	7.6129	1.08088e-05	5.34677	8.8104e-08
6.84083	5.70545e-07	7.66208	1.0758e-05	5.38131	8.77139e-08
6.88473	5.67923e-07	7.71126	1.07078e-05	5.41585	8.73271e-08
6.92864	5.65324e-07	7.76044	1.0658e-05	5.45039	8.69434e-08
6.97255	5.62748e-07	7.80961	1.06086e-05	5.48493	8.6563e-08
7.01646	5.60194e-07	7.85879	1.05597e-05	5.51947	8.61857e-08
7.06037	5.57663e-07	7.90797	1.05112e-05	5.55401	8.58116e-08
7.10428	5.55153e-07	7.95715	1.04631e-05	5.58855	8.54405e-08
7.14819	5.52666e-07	8.00633	1.04155e-05	5.62309	8.50725e-08
7.19209	5.50199e-07	8.05551	1.03682e-05	5.65763	8.47075e-08
7.236	5.47754e-07	8.1047	1.03214e-05	5.69218	8.43455e-08
7.27991	5.4533e-07	8.15388	1.0275e-05	5.72672	8.39864e-08
7.32382	5.42927e-07	8.20306	1.02291e-05	5.76126	8.36302e-08
7.36773	5.40544e-07	8.25224	1.01835e-05	5.7958	8.3277e-08
7.41164	5.38181e-07	8.30142	1.01383e-05	5.83034	8.29265e-08
7.45555	5.35838e-07	8.3506	1.00934e-05	5.86488	8.25789e-08
7.49946	5.33515e-07	8.39978	1.0049e-05	5.89943	8.22341e-08
7.54337	5.31211e-07	8.44897	1.0005e-05	5.93397	8.1892e-08
7.58728	5.28926e-07	8.49815	9.96129e-06	5.96851	8.15527e-08
7.6312	5.26661e-07	8.54733	9.91799e-06	6.00305	8.1216e-08
7.67511	5.24414e-07	8.59651	9.87505e-06	6.03759	8.0882e-08
7.71902	5.22186e-07	8.6457	9.83247e-06	6.07214	8.05506e-08
7.76293	5.19976e-07	8.69488	9.79025e-06	6.10668	8.02219e-08
7.80684	5.17784e-07	8.74406	9.74838e-06	6.14122	7.98957e-08
7.85075	5.1561e-07	8.79325	9.70686e-06	6.17577	7.9572e-08
7.89467	5.13454e-07	8.84243	9.66568e-06	6.21031	7.92509e-08
7.93858	5.11315e-07	8.89161	9.62484e-06	6.24485	7.89323e-08
7.98249	5.09194e-07	8.9408	9.58434e-06	6.2794	7.86161e-08
8.0264	5.07089e-07	8.98998	9.54417e-06	6.31394	7.83023e-08
8.07031	5.05002e-07	9.03917	9.50432e-06	6.34848	7.7991e-08
8.11423	5.02931e-07	9.08835	9.4648e-06	6.38303	7.76821e-08
8.15814	5.00877e-07	9.13753	9.42561e-06	6.41757	7.73755e-08
8.20205	4.98839e-07	9.18672	9.38672e-06	6.45211	7.70712e-08
8.24597	4.96817e-07	9.2359	9.34815e-06	6.48666	7.67693e-08
8.28988	4.94811e-07	9.28509	9.30989e-06	6.5212	7.64696e-08
8.33379	4.92821e-07	9.33427	9.27194e-06	6.55575	7.61722e-08
8.37771	4.90846e-07	9.38346	9.23428e-06	6.59029	7.5877e-08
8.42162	4.88887e-07	9.43265	9.19693e-06	6.62484	7.5584e-08
8.46553	4.86943e-07	9.48183	9.15987e-06	6.65938	7.52933e-08
8.50945	4.85014e-07	9.53102	9.1231e-06	6.69392	7.50046e-08
8.55336	4.83099e-07	9.5802	9.08662e-06	6.72847	7.47181e-08
8.59727	4.812e-07	9.62939	9.05042e-06	6.76301	7.44338e-08
8.64119	4.79315e-07	9.67857	9.01451e-06	6.79756	7.41515e-08

## Sheet: Figure 4b
Figure 4b
	Cabot	BioMC
α=2 (mass diffusion)	1.38	0.25
α=3 (laminar flow)	0.24	0.04

## Sheet: Figure 4c
Figure 4c
	Cabot					BioMC
	R1/R2	xEr ±	Rhiera (kPa·m5·s·mg-1)	yEr ±		R1/R2	xEr ±	Rhiera (kPa·m5·s·mg-1)	yEr ±
H2	0.158	0.021	49.467	1.419		0.925	0.101	22.6	1.947
O2	0.217	0.031	6.283	0.825		1.169	0.143	3.043	0.192
H2O2	0.202	0.026	32.9	1.552		1.17	0.145	16.167	1.069

## Sheet: Figure 4e
Figure 4e
	R1/R2	Rhiera (s/m)
SAPO-0.05	100	15854700000
SAPO-0.5	1.79641	4380170000
SAPO-1 (0.16)	0.4847	6708000000
SAPO-1 (0.1)	0.44978	4766510000
SAPO-1 (0.08)	1.1321	2233200000
SAPO-1 (0.05)	0.7853	2221500000
SAPO-3.5	0.06928	7493880000
SAPO-8	0.04323	12631300000
